# Supplementary material
Source: Springer Nature journal article supplement (https://www.springermedizin.de/resource/supplementary/12889_2002_44_MOESM1_ESM.pdf/9500174)

Eastern Mediterranean WHO Region

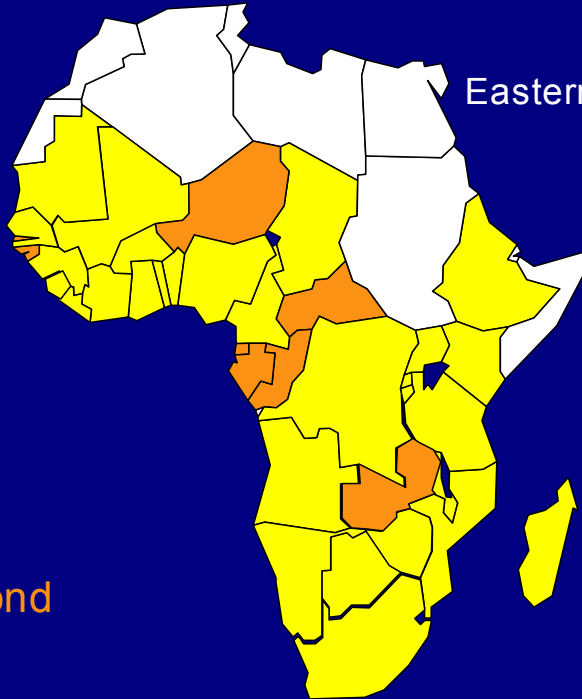

AFRO  
Responded

AFRO  
Did not respond

Supplement: MOESM1 [file 9500174]
